# Supplementary material for: The development of a blended emergent research training program for clinical nurses (Part 1)
Source: Research Square preprint supplement (doi:10.21203/rs.3.rs-777915/v1), 2021-09-21
Supplement: Supplementary file 1 [file 4132cfea926ce60b55c30042.pdf]

**Table S1. Common types of current nursing research training programs, limitations of these programs, and potential solutions for addressing these limitations.**

| <b>Common types of current nursing research training programs</b>                 |                                                                                                                                                                                                                                                                                                                                                                                               |
|-----------------------------------------------------------------------------------|-----------------------------------------------------------------------------------------------------------------------------------------------------------------------------------------------------------------------------------------------------------------------------------------------------------------------------------------------------------------------------------------------|
| Lectures, conferences, workshops, short-term training programs, and journal clubs |                                                                                                                                                                                                                                                                                                                                                                                               |
| <b>Limitations</b>                                                                | <b>Solutions</b>                                                                                                                                                                                                                                                                                                                                                                              |
| Unmet needs in the training contents                                              | <p>Construct the training program contents based on a needs assessment of learners.</p> <p>Use cases closely related to clinical nursing in learning materials and assignments.</p> <p>Focus more on the practical research knowledge and skills often used by clinical nursing research.</p> <p>Use emergent teaching* in training program to meet learners' needs on training contents.</p> |
| Lack of systematicity                                                             | Construct and organize the training program contents systematically.                                                                                                                                                                                                                                                                                                                          |
| Lack of "hand-on" practical courses                                               | <p>Include "hand-on" practice courses of commonly used nursing research software in the training program.</p> <p>Include practice assignments in the training program.</p>                                                                                                                                                                                                                    |
| Hard to understand                                                                | <p>Provide suitable media resources for better understanding.</p> <p>Use cases closely related to clinical nursing.</p> <p>Sequence training contents from easy to difficult.</p>                                                                                                                                                                                                             |
| Lack of up-to-date contents                                                       | Develop learning materials based on not only textbooks, but also on the most recent academic literature.                                                                                                                                                                                                                                                                                      |
| Teacher-centered teaching method                                                  | <p>Construct the training program contents based on a needs assessment of learners.</p> <p>Use emergent teaching* in the training program to implement learner-centered learning.</p>                                                                                                                                                                                                         |
| Lack of continuous supports                                                       | Provide continuous supports (e.g. access to learning materials and help from the trainers) after the training program.                                                                                                                                                                                                                                                                        |
| Lack of system for feedback                                                       | Continuously collect feedback during the training process to improve the training program.                                                                                                                                                                                                                                                                                                    |
| Time-limited                                                                      | <p>Use blended learning**.</p> <p>Provide a longer time for the training program.</p>                                                                                                                                                                                                                                                                                                         |
| Lack of theoretical foundation                                                    | Construct the training program based on a relevant theoretical foundation.                                                                                                                                                                                                                                                                                                                    |
